# Supplementary material for: The Receptor Tyrosine Kinase c-Met Promotes Lipid Accumulation in 3T3-L1 Adipocytes
Source: MDPI journal article supplement (doi:10.3390/ijms24098086), 2023-04-29
Supplement: s1 [file s1]

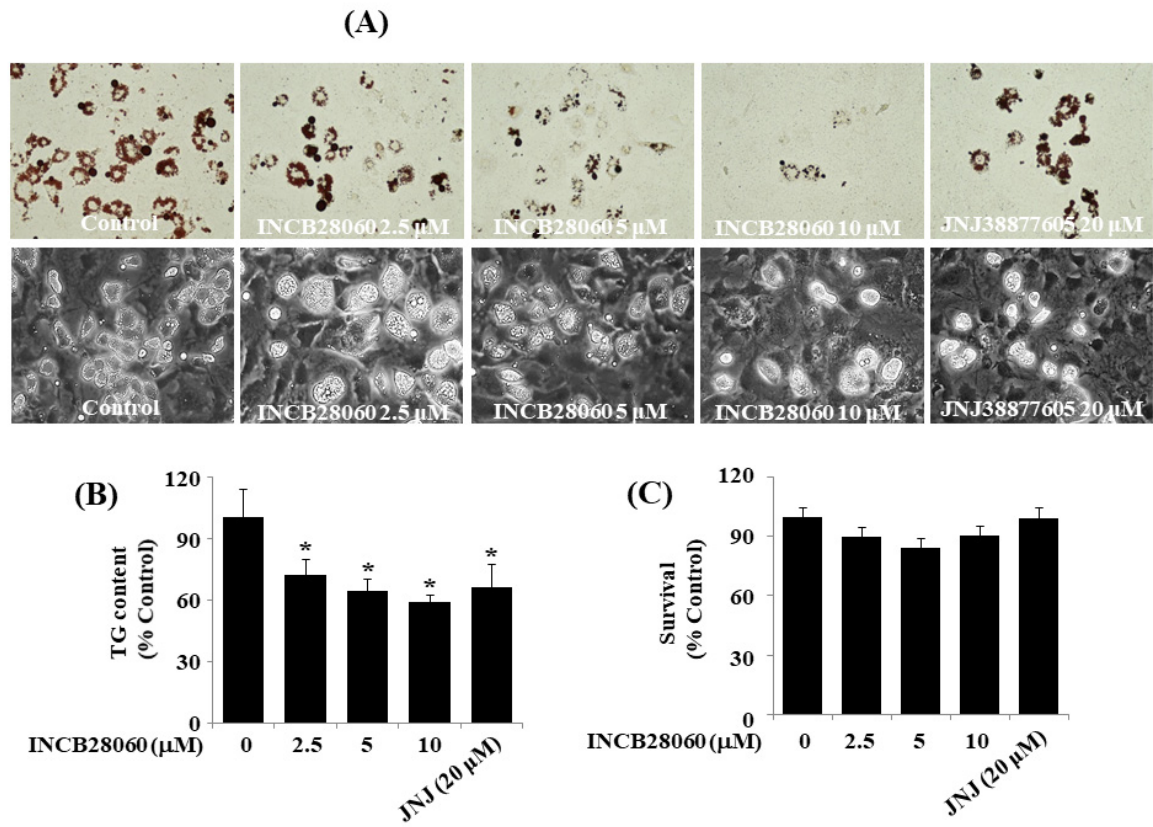

**Figure S1.** INCB28060, another c-Met inhibitor, reduces lipid accumulation and TG content during 3T3-L1 preadipocyte differentiation.
